# Supplementary material for: Effect of Innovative Sediment-Based Growing Media on Fruit Quality of Wild Strawberry (Fragaria vesca L.)
Source: MDPI journal article supplement (doi:10.3390/su15097338), 2023-04-28
Supplement: s1 [file s1]

**Table S1.** Chemico-physical properties of growing substrates analysed at the final stage of plant cultivation in relation to water regime.

| Parameters                                                         | TS0   |       | TS50  |       | TS100 |       |
|--------------------------------------------------------------------|-------|-------|-------|-------|-------|-------|
|                                                                    | WR1   | WR2   | WR1   | WR2   | WR1   | WR2   |
| Bulk density (g cm <sup>-3</sup> )                                 | 0.39  | 0.37  | 0.82  | 0.91  | 1.04  | 1.04  |
| pH                                                                 | 6.5   | 5.8   | 6.1   | 6.2   | 7.2   | 6.8   |
| EC (dS m <sup>-1</sup> )                                           | 0.13  | 0.15  | 0.38  | 0.26  | 0.23  | 0.12  |
| TN (%)                                                             | 0.53  | 0.59  | 0.17  | 0.19  | 0.11  | 0.15  |
| TOC (%)                                                            | 10.69 | 15.90 | 2.14  | 2.38  | 1.51  | 6.59  |
| Phosphorus (g Kg <sup>-1</sup> )                                   | 0.59  | 0.65  | 0.71  | 0.66  | 0.75  | 0.79  |
| NO <sub>3</sub> <sup>-</sup> (mg Kg <sup>-1</sup> )                | 8.3   | 20.8  | 28.9  | 25.3  | 34.0  | 20.8  |
| NH <sub>4</sub> <sup>+</sup> (mg Kg <sup>-1</sup> )                | 1.43  | 2.25  | 3.16  | 3.81  | 0.88  | 1.08  |
| <b>Minerals (g Kg<sup>-1</sup>)</b>                                |       |       |       |       |       |       |
| Pb                                                                 | 0.01  | 0.02  | 0.04  | 0.03  | 0.03  | 0.04  |
| Fe                                                                 | 4.71  | 6.98  | 13.60 | 12.45 | 12.44 | 14.41 |
| Cr                                                                 | 0.00  | 0.00  | 0.04  | 0.04  | 0.05  | 0.05  |
| Cu                                                                 | 0.04  | 0.10  | 0.11  | 0.09  | 0.06  | 0.08  |
| Zn                                                                 | 0.05  | 0.11  | 0.16  | 0.16  | 0.16  | 0.16  |
| Ni                                                                 | 0.00  | 0.00  | 0.04  | 0.04  | 0.04  | 0.04  |
| Mn                                                                 | 0.32  | 0.50  | 0.38  | 0.41  | 0.38  | 0.59  |
| Mg                                                                 | 1.84  | 2.23  | 3.47  | 3.32  | 3.25  | 3.70  |
| Cd                                                                 | -     | -     | -     | -     | -     | -     |
| K                                                                  | 4.30  | 5.55  | 4.81  | 4.10  | 2.41  | 2.37  |
| Ca                                                                 | 5.63  | 6.98  | 11.94 | 11.83 | 12.69 | 12.46 |
| Na                                                                 | 0.98  | 1.33  | 1.03  | 0.81  | 0.61  | 0.66  |
| <b>Enzymatic activity<br/>(μmol/g<sup>-1</sup> h<sup>-1</sup>)</b> |       |       |       |       |       |       |
| β-Glucosidase                                                      | 854   | 623   | 325   | 282   | 267   | 169   |
| Phosphatase                                                        | 2238  | 1630  | 337   | 351   | 229   | 260   |
| Aryl Sulfatase                                                     | 147   | 430   | 125   | 127   | 74    | 63    |
| Butyrate esterase                                                  | 3416  | 1936  | 1404  | 1384  | 1109  | 1161  |
