# Supplementary figures and images for: Effect of Innovative Sediment-Based Growing Media on Fruit Quality of Wild Strawberry (Fragaria vesca L.)
Source: MDPI journal article supplement (doi:10.3390/su15097338), 2023-04-28

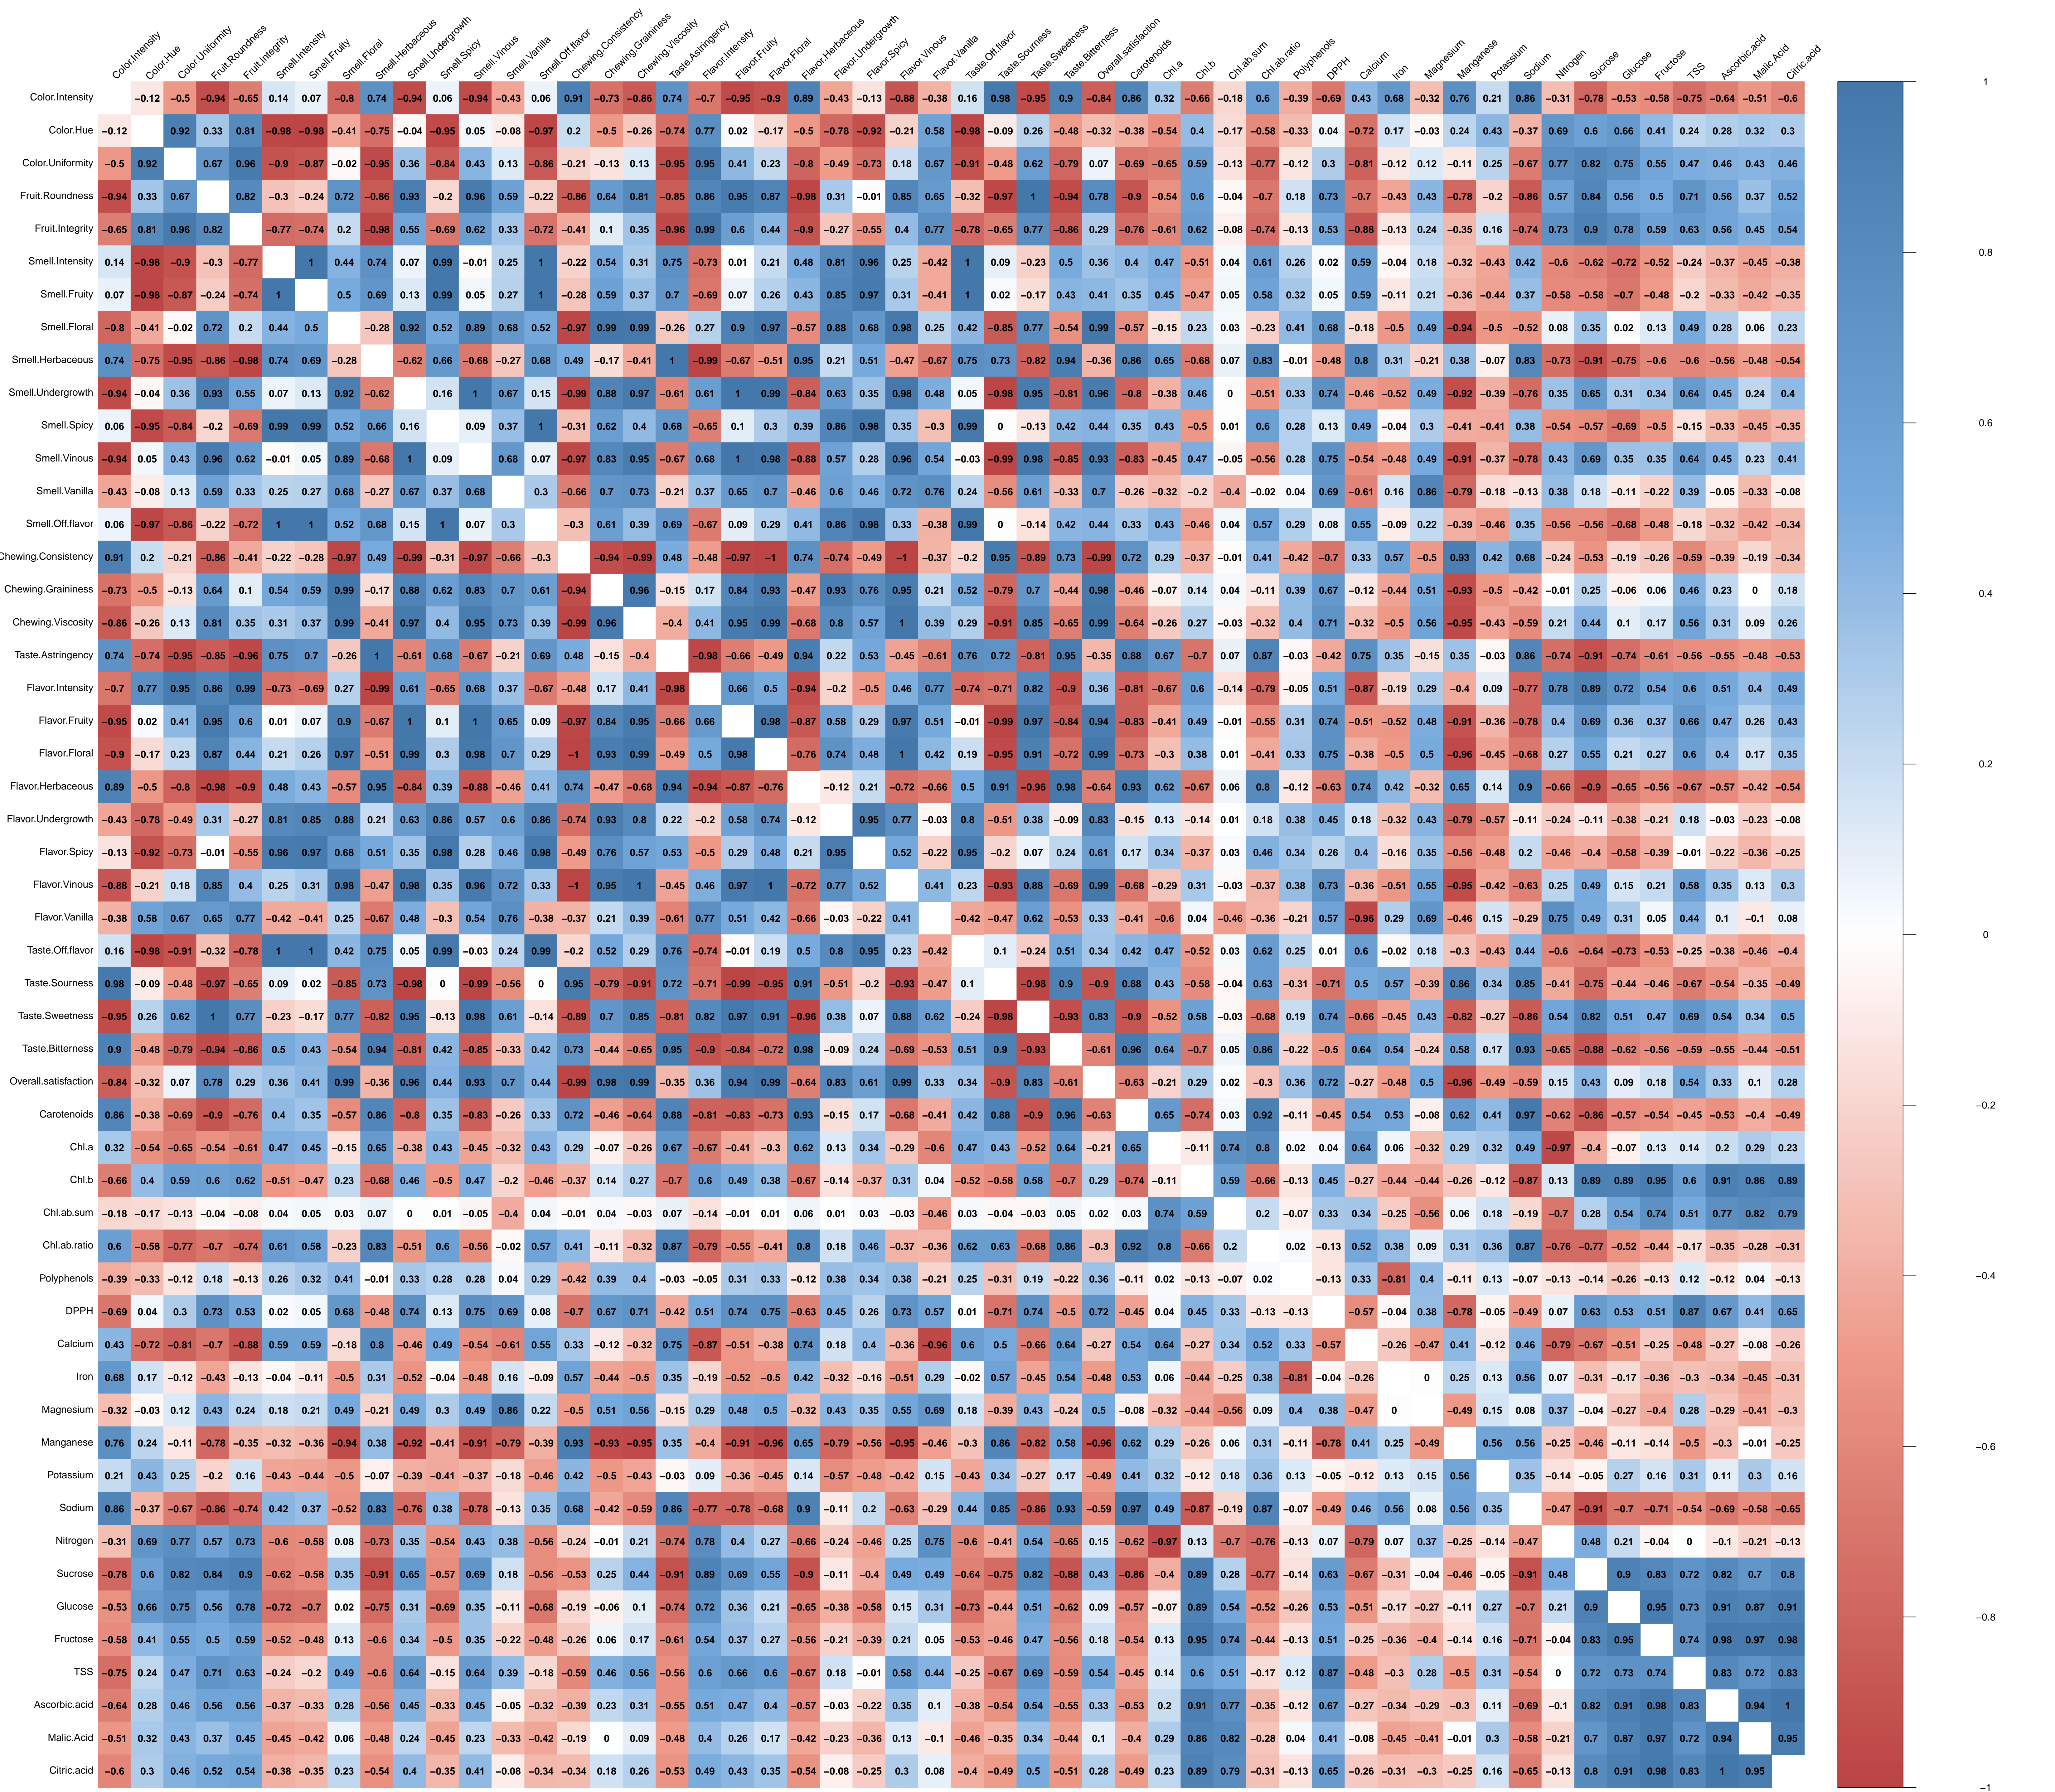

Supplement: s1 [file s1]
